January 2013

# PSYCHIATRIC SERVICES

A Journal of the  
American Psychiatric  
Association

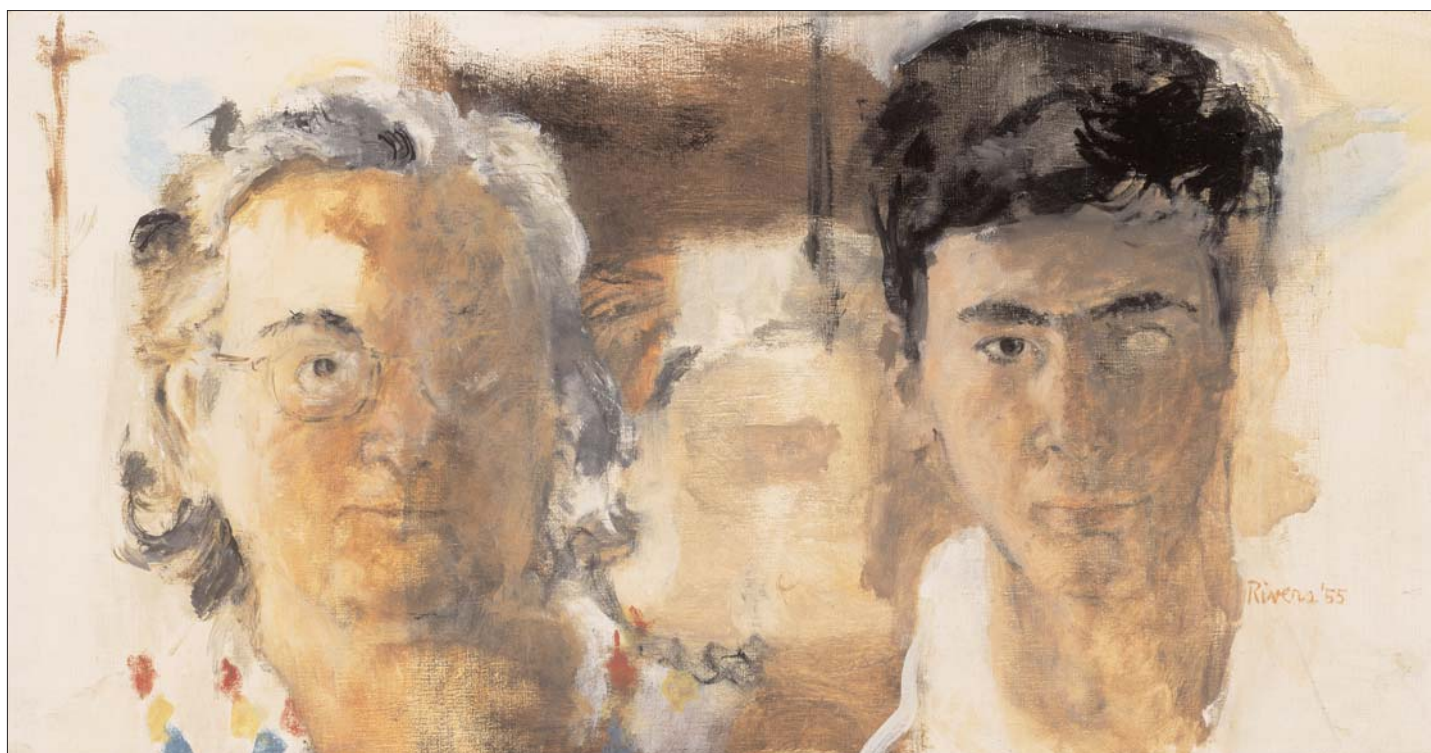

◆ Telephone Support After Residential Treatment of Veterans With PTSD

◆ Benzodiazepines and PTSD: Variations in Prescribing Signal Clinical Uncertainty

◆ Thinking Strategically About Suicide Prevention: Setting National Priorities
