# TAKING ISSUE

## A Dilemma of Logic for the VA?

In this issue, Rosen and colleagues report on an exquisitely well-designed and well-implemented research effort to examine a strategy to improve outcomes for veterans with posttraumatic stress disorder (PTSD) after discharge from residential treatment. However, the aim of the study, although well intentioned, seems naïve given current realities, and it misses the mark in regard to lessons learned over the past 30 years about treatment outcomes for veterans with PTSD and the challenges that treatment presents.

If active residential treatment is itself ineffective, as past and current research suggests, what is the value in examining continuity-of-care strategies after residential treatment? Perhaps part of this study's value is as a cautionary note to others. However, the history of the Department of Veterans Affairs (VA) treatment efforts for veterans with PTSD suggests that future generations are unlikely to heed the available lessons.

In the late 1990s, residential and inpatient programs operated by the VA were shut down all over the United States for lack of demonstrated efficacy. One wonders why such expensive programs have been restarted when there is no evidence to support them. It seems that the VA continually attempts to reinvent the wheel as each new generation of politicians and administrators fails to learn what others before them have already learned.

It also is time for VA leaders and researchers to reflect on why veterans with PTSD are not benefiting from treatment, especially when civilians with PTSD do. Although politically inconvenient to say, the VA's current disability policies, which reinforce illness roles and provide disincentives to work and to recover, likely have much to do with this disparity. About 45% of Iraq and Afghanistan veterans have already applied for VA disability benefits, a remarkably high rate compared with 11% and 16%, respectively, for veterans of World War II and Vietnam. This represents a historically unprecedented and dramatic rise in disability applications—and for a war with a different pattern of combat exposure and comparatively lower typical battle casualties.

Rosen and colleagues indicate that almost 70% of the patients in their study were already receiving VA cash disability payments, and the other 30% may have already applied or will apply in the future. Thus virtually all patients have a powerful secondary-gain incentive to remain symptomatic.

For several years the VA has required completion every 90 days of a PTSD symptom checklist by all veterans with a diagnosis of PTSD in order to monitor symptom trajectories. Have these national data on treatment effectiveness ever been published or disseminated? What do they indicate?

The VA now faces a dilemma of logic: Either VA evidence-based treatments and programs work as expected and most veterans will recover, in which case they no longer require disability payments, or these expensive treatments do not work, in which case it is difficult to justify the expanding VA budgets for inert mental health programs. Logically, it cannot be both.—B. CHRISTOPHER FRUEH, PH.D., *University of Hawaii, Hilo, and the Menninger Clinic, Houston, Texas*

*Psychiatric Services*, established in 1950, is published monthly by the American Psychiatric Association for mental health professionals and others concerned with treatment and services for persons with mental illnesses and mental disabilities, in keeping with APA's objectives to improve care and treatment, to promote research and professional education in psychiatric and related fields, and to advance the standards of all psychiatric services and facilities.

### Editor

Howard H. Goldman, M.D., Ph.D.

### Editorial Board

David A. Adler, M.D.  
Javier I. Escobar, M.D.  
Stephen M. Goldfinger, M.D.  
Richard K. Harding, M.D.  
Roberto Lewis-Fernández, M.D.  
Grayson S. Norquist, M.D., M.S.P.H.  
Martha Sajatovic, M.D.  
Gregory E. Simon, M.D., M.P.H.  
Bradley D. Stein, M.D., Ph.D.  
Marvin S. Swartz, M.D.  
Marcia Valenstein, M.D.  
Bonnie T. Zima, M.D., M.P.H.

### Editor Emeritus

John A. Talbott, M.D.

### Book Review Editor

Jeffrey L. Geller, M.D., M.P.H.

### Contributing Editors

Paul S. Appelbaum, M.D., *Law & Psychiatry*

José Miguel Caldas de Almeida, M.D., and Marcela Horvitz-Lennon, M.D., M.P.H., *Mental Health Care Reforms in Latin America*

Francine Cournos, M.D., and Stephen M. Goldfinger, M.D., *Frontline Reports*

Lisa B. Dixon, M.D., M.P.H., and Brian Hepburn, M.D., *Public-Academic Partnerships*

Jeffrey L. Geller, M.D., M.P.H., *Personal Accounts*

William M. Glazer, M.D., *Best Practices*  
Amy M. Kilbourne, Ph.D., M.P.H., and Tami L. Mark, Ph.D., *Datapoints*

Matt Muijen, M.D., Ph.D., *Mental Health Care Reforms in Europe*  
Fred C. Osher, M.D., *State Mental Health Policy*

Jules M. Ranz, M.D., and Susan M. Deakins, M.D., *Case Studies in Public-Sector Leadership*

Steven S. Sharfstein, M.D., Haiden A. Huskamp, Ph.D., and Alison Evans Cuellar, Ph.D., *Economic Grand Rounds*

### Statistical Consultant

Deborah R. Medoff, Ph.D.

### Editorial Consultants

Joseph M. Cerimele, M.D.  
Julie M. Donohue, Ph.D.  
Robert E. Drake, M.D., Ph.D.  
M. Susan Ridgely, J.D.  
Laura Van Tosh

### Editorial Staff

Constance Grant Gartner, *Managing Editor*

Demarie S. Jackson, *Associate Editor*  
Kathleen Stearman, *Associate Editor*  
Wendy Lieberman Taylor, *Production Manager*

Y. Nicole Gray, *Editorial Support Services Manager*

### Publisher

Rebecca D. Rinehart

### American Psychiatric Association

Dilip V. Jeste, M.D., *President*  
Jeffrey A. Lieberman, M.D., *President-Elect*  
Roger Peele, M.D., *Secretary*  
David Fassler, M.D., *Treasurer*  
R. Scott Benson, M.D., *Speaker, APA Assembly*  
James H. Scully, M.D., *Medical Director and CEO*
